# Supplementary material for: Use of curcumin-modified diamond nanoparticles in cellular imaging and the distinct ratiometric detection of Mg2+/Mn2+ ions
Source: Royal Society of Chemistry journal article supplement (doi:10.1039/d1na00298h), 2021-01-01
Supplement: d1na00298h1.pdf [file d1na00298h1.pdf]

## Supplementary data

### Use of curcumin-modified diamond nanoparticles in cellular imaging and the distinct ratiometric detection of $Mg^{2+}/Mn^{2+}$ ions

Bo-wei Du<sup>a</sup>, Le Trong Tien<sup>a</sup>, Ching-Chang Lin<sup>b</sup>, Fu-Hsiang Ko<sup>a\*</sup>

<sup>a</sup> Department of Materials Science and Engineering, National Chiao Tung University, 1001 University Road, Hsinchu, 30010, Taiwan

<sup>b</sup> Research Center for Advanced Science and Technology (RCAST), The University of Tokyo, 4-6-1 Komaba, Meguro-ku, Tokyo, 153-8904, Japan

\* Department of Materials Science and Engineering, National Chiao Tung University,

Hsinchu 300, Taiwan. \*E-mail: fhko@mail.nctu.edu.tw

#### Table of contents:

FTIR and Raman spectrum of ND pristine, ND-Acid and **ND-Cur** particles. **(S1)**

DLS analysis of **ND-Cur** in deionized water. **(S2)**

Raman spectra interrogations of **ND-Cur** in presence of different metal ions. **(S3)**

DLS analysis of **ND-Cur** in deionized water. **(Table S1)**

PL spectrum ( $\lambda_{ex} = 365$  nm) of **ND-Cur** (100  $\mu\text{g}/\text{mL}$ ). **(S4)**

XRD spectrum of ND and **ND-Cur**. **(S5)**

Linear correlation diagrams of  $Mg^{2+}$ , located in 0 to 45  $\mu\text{M}$  and 45-100  $\mu\text{M}$ , respectively. **(S6)**

Fluorescence spectral changes ( $\lambda_{ex} = 365$  nm) of **ND-Cur** in the presence of various concentrations of  $Mn^{2+}$  and  $Mg^{2+}$  and detection limit calculated by standard deviation and linear fitting of  $Mn^{2+}$  and  $Mg^{2+}$  at pH 6.0 and 6.5, respectively. **(S7)**

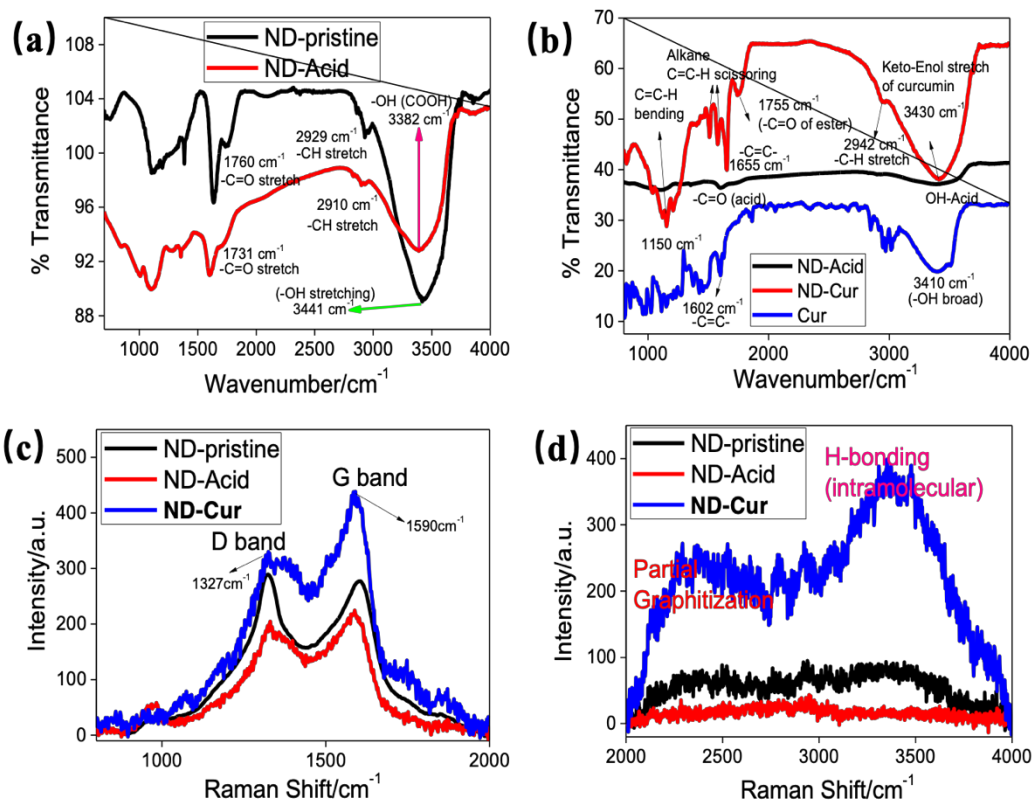

**Fig S1.** (a) FTIR of ND pristine and ND-Acid and (b) ND-acid, Curcumin and ND-Cur. (c) and (d) Raman spectrum of ND, ND-acid, ND-Cur particles.

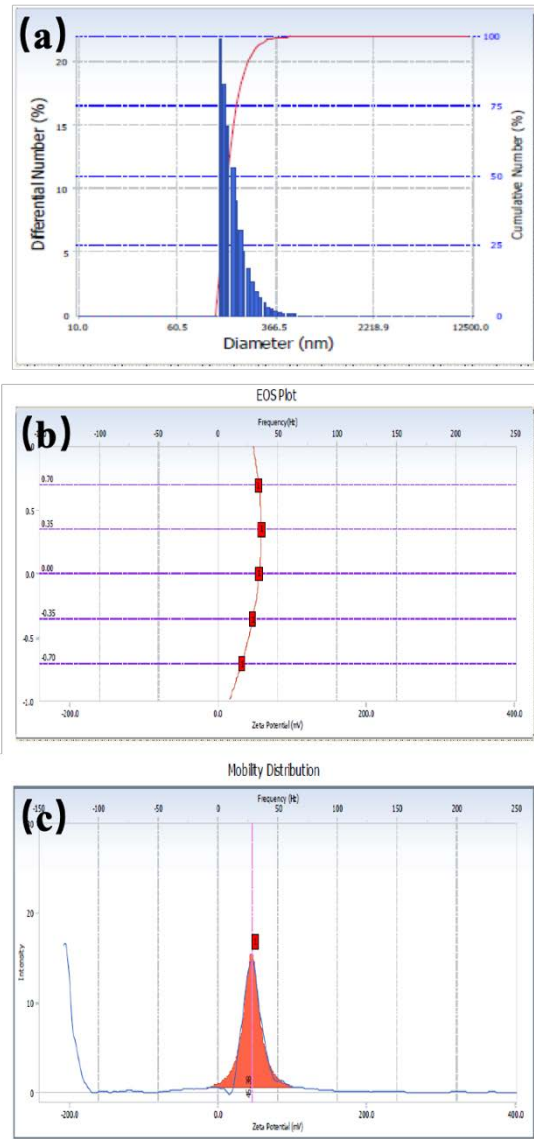

**Fig S2.** DLS analysis of **ND-Cur** in water. **(a)** size analysis of **ND-Cur** in water (100  $\mu\text{g}/\text{mL}$  in water). **(b)** and **(c)** Zeta potential of **ND-Cur** (100  $\mu\text{g}/\text{mL}$  in water).

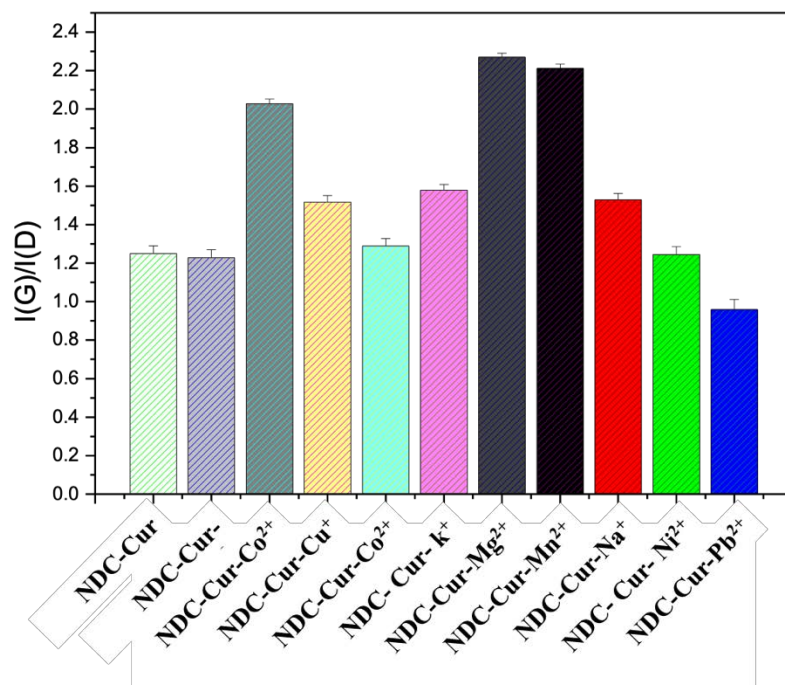

Fig S3. D and G bands and I (G)/ I (D) of ND-Cur in presence of different metal ions.

Table S1. DLS analysis of ND-Cur in deionized water.

| Compound | Zeta potential (mV) | Size (nm)    |
|----------|---------------------|--------------|
| ND-acid  | -28.44              | 66.6 ± 18.6  |
| ND-Cur   | +45.38              | 170.6 ± 46.8 |

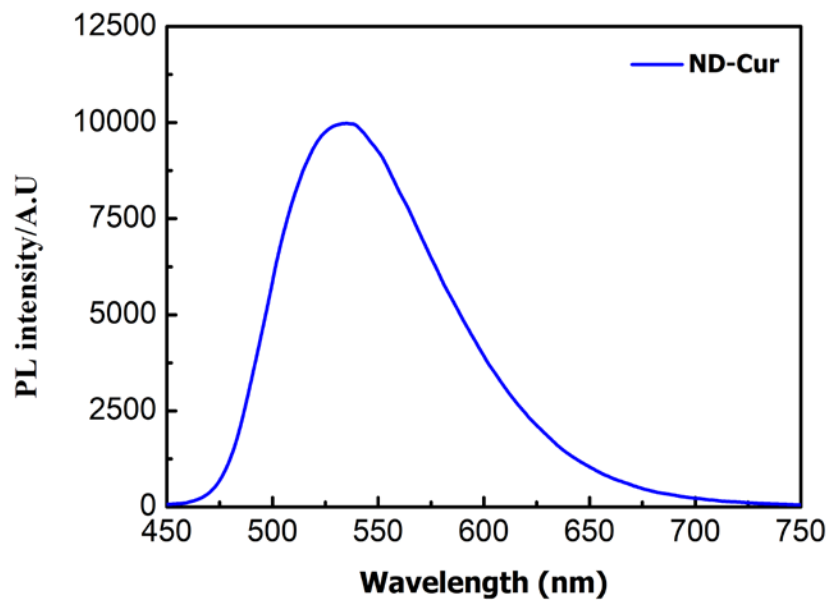

Fig S4. PL spectrum ( $\lambda_{\text{ex}} = 365 \text{ nm}$ ) of ND-Cur (100  $\mu\text{g}/\text{mL}$ ).

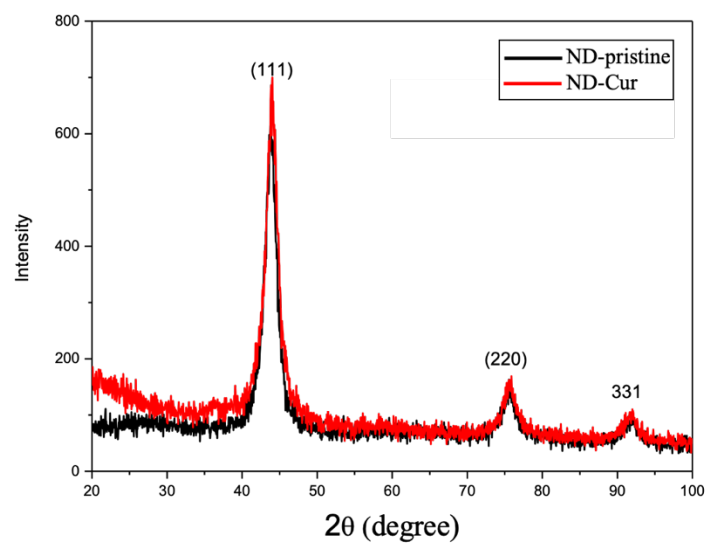

Fig S5. XRD spectrum of ND and ND-Cur.

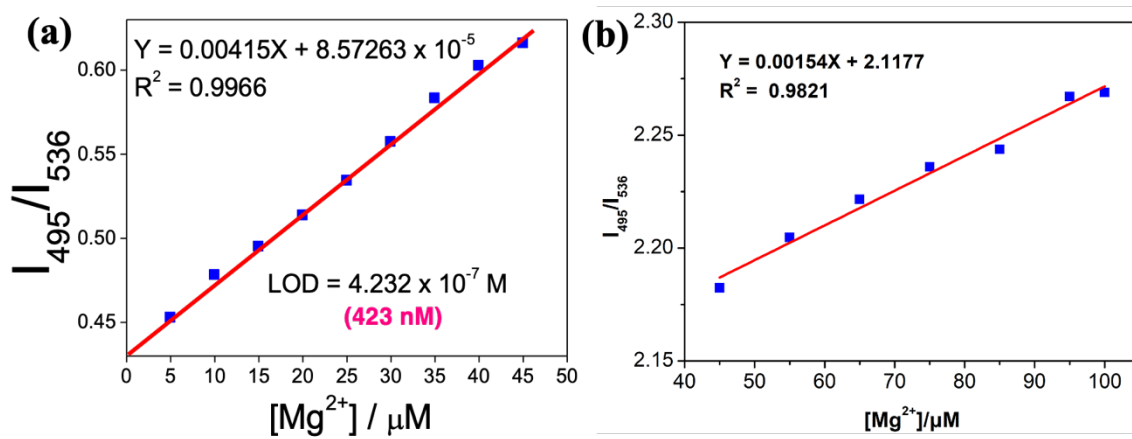

**Fig S6.** Linear correlation diagrams of  $Mg^{2+}$ , located in (a) 0 to 45  $\mu M$  and (b) 45-100  $\mu M$ , respectively.

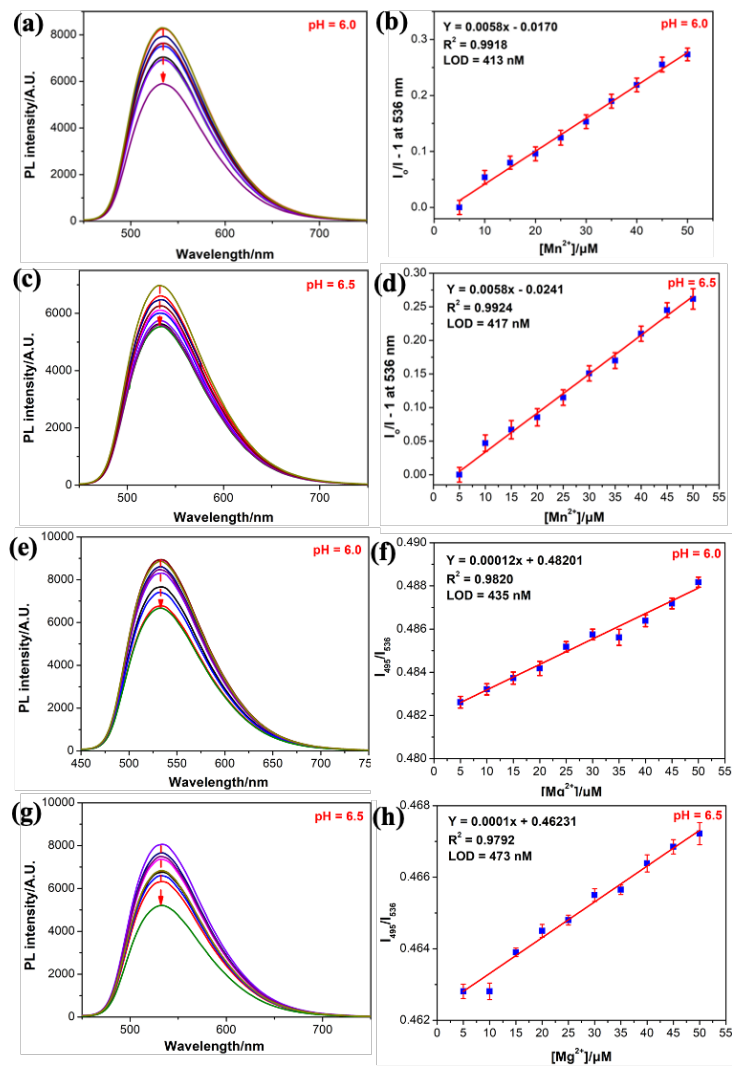

**Fig S7.** Fluorescence spectral changes ( $\lambda_{ex} = 365$  nm) of **ND-Cur** in the presence of various concentrations of (a), (c)  $Mn^{2+}$  and (e), (g)  $Mg^{2+}$  and detection limit calculated by standard deviation and linear fitting of (b), (d)  $Mn^{2+}$  and (f), (h)  $Mg^{2+}$  at pH 6.0 and 6.5, respectively.
